# Supplementary material for: Applicability of a clinical decision support system for screening the risk of laryngotracheal aspiration in hospitalized adults: a methodological study
Source: Research Square preprint supplement (doi:10.21203/rs.3.rs-2064772/v1), 2022-10-13
Supplement: Supplementary file 1 [file 43d8caf9fdcbdee5f53b7fe7.xlsx]

## Sheet: Planilha1
Variable	Node	Node Id.	Status	Probability
Laryngotracheal aspiration	ALT	C1	Yes	0.35
			No	0.65
Head and neck diseases	Cabeça_Pe	C31	Neoplastic	0.1
			Orthognathic	0.01
			No	0.89
Cardiovascular diseases	Cardiovasc	C29	Yes	0.05
			No	0.95
Comorbidities	Comorbida	C18	With	0.27
			Without	0.73
Communication	Comunicac	C7	Impaired	0.31
			Not impaired	0.69
History of oropharyngeal dysphagia	DOF	C11	Yes	0.31
			No	0.69
Worrisome diagnosis	DX_Ppte	C2	Worrisome	0.28
			Not worrisome	0.72
Digestive diseases	Digestiva	C27	Yes	0.02
			No	0.98
Dyspnea	Dispneia	C19	Yes	0.32
			No	0.68
Disease	Doenca	C24	Yes	0.08
			No	0.92
Saliva and/or secretion management	Ger_Saliva	C22	Adequate	0.77
			Inadequate	0.23
Disease severity	Gravidade	C3	Stable	0.21
			Unstable	0.79
Relevant history related to swallowing	Hist_REL	C10	Yes	0.29
			No	0.71
Age	Idade	C14	Elderly	0.79
			Adult	0.21
Respiratory infections associated with aspiration	Infx_RESP	C12	Yes	0.08
			No	0.92
Need for surgical intervention	Int_CX	C4	Yes, with complications	0.35
			No OR yes, without complications	0.65
Medications that affect the level of consciousness	Mdtos	C9	Yes	0.12
			No	0.88
Neurological diseases	Neurologico	C25	Yes	0.12
			No	0.88
Neuromuscular diseases	Neuromusc	C26	Yes	0.01
			No	0.99
State of consciousness	Nivel_Cons	C6	Impaired	0.28
			Not impaired	0.72
Other factors associated with swallowing	Outros_Fato	C13	Yes	0.56
			No	0.44
Unplanned weight loss	Perda_Pes	C17	Yes	0.52
			No	0.48
Body posture	Postura	C8	Adequate	0.83
			Inadequate	0.17
Pre-feeding	Pre_Alim	C5	Adequate	0.73
			Inadequate	0.27
Psychiatric illnesses	Psiquiatrica	C30	Yes	0.02
			No	0.98
Respiratory diseases	Pulmonar	C28	Yes	0.14
			No	0.86
Gastroesophageal reflux	RGE	C16	With	0.49
			Without	0.51
Voluntary cough	Tosse_VOL	C21	Efficient	0.65
			Inefficient	0.35
Tracheostomy and/or feeding tubes	Tubos	C15	Yes	0.44
			No	0.56
Airway protection	VA	C20	Protected	0.66
			Unprotected	0.34
Vocal quality	Voz	C23	Adequate	0.56
			Inadequate	0.44
