# Supplementary material for: Applicability of a clinical decision support system for screening the risk of laryngotracheal aspiration in hospitalized adults: a methodological study
Source: Research Square preprint supplement (doi:10.21203/rs.3.rs-2064772/v1), 2022-10-13
Supplement: Supplementary file 2 [file c2c7ff6ebed1e0a7d2dcf572.xlsx]

## Sheet: Planilha1
Node	Variable	Status	Probability
Worrisome diagnosis	Disease	Yes	0.6
		No	0.0
	Severity	Stable	0.0
		Unstable	0.2
	Need for surgical intervention	Yes, with complications	0.2
		No / Yes, without complications	0.0
Pre-feeding	State of consciousness	Impaired	0.6
		Not impaired	0.0
	Communication	Impaired	0.2
		Not impaired	0.0
	Body posture	Adequate	0.0
		Inadequate	0.2
Relevant history	Oropharyngeal dysphagia	Yes	0.5
		No	0.0
	Respiratory infections associated with feeding	Yes	0.3
		No	0.0
	Unplanned weight loss	Yes	0.2
		No	0.0
Other factors	Age	Elderly	0.4
		Adult	0.0
	Tracheostomies and feeding tubes	Yes	0.3
		No	0.0
	Gastroesophageal reflux	Yes	0.1
		No	0.0
	Comorbidities	Yes	0.2
		No	0.0
Airway protection	Cough	Efficient	0.0
		Inefficient	0.6
	Saliva and/or secretion management	Adequate	0.0
		Inadequate	0.25
	Vocal quality	Adequate	0.0
		Inadequate	0.15
Risk of laryngotracheal aspiration	Worrisome diagnosis	Impaired	0.1
		Not Impaired	0.0
	Pre-feeding	Impaired	0.3
		Not Impaired	0.0
	Relevant history	Impaired	0.2
		Not Impaired	0.0
	Other factors	Impaired	0.1
		Not impaired	0.0
	Airway protection	Impaired	0.3
		Not impaired	0.0
